# Supplementary material
Source: Springer Nature journal article supplement (https://www.springermedizin.de/resource/supplementary/13256_2010_1548_MOESM3_ESM.pdf/9647904)

D 10 1.00 1.00  
P -190.0  
A 0.0  
B 259  
F 3  
HF/S  
120KV  
225MA  
VOLUME

TOMOSCAN SR7

L

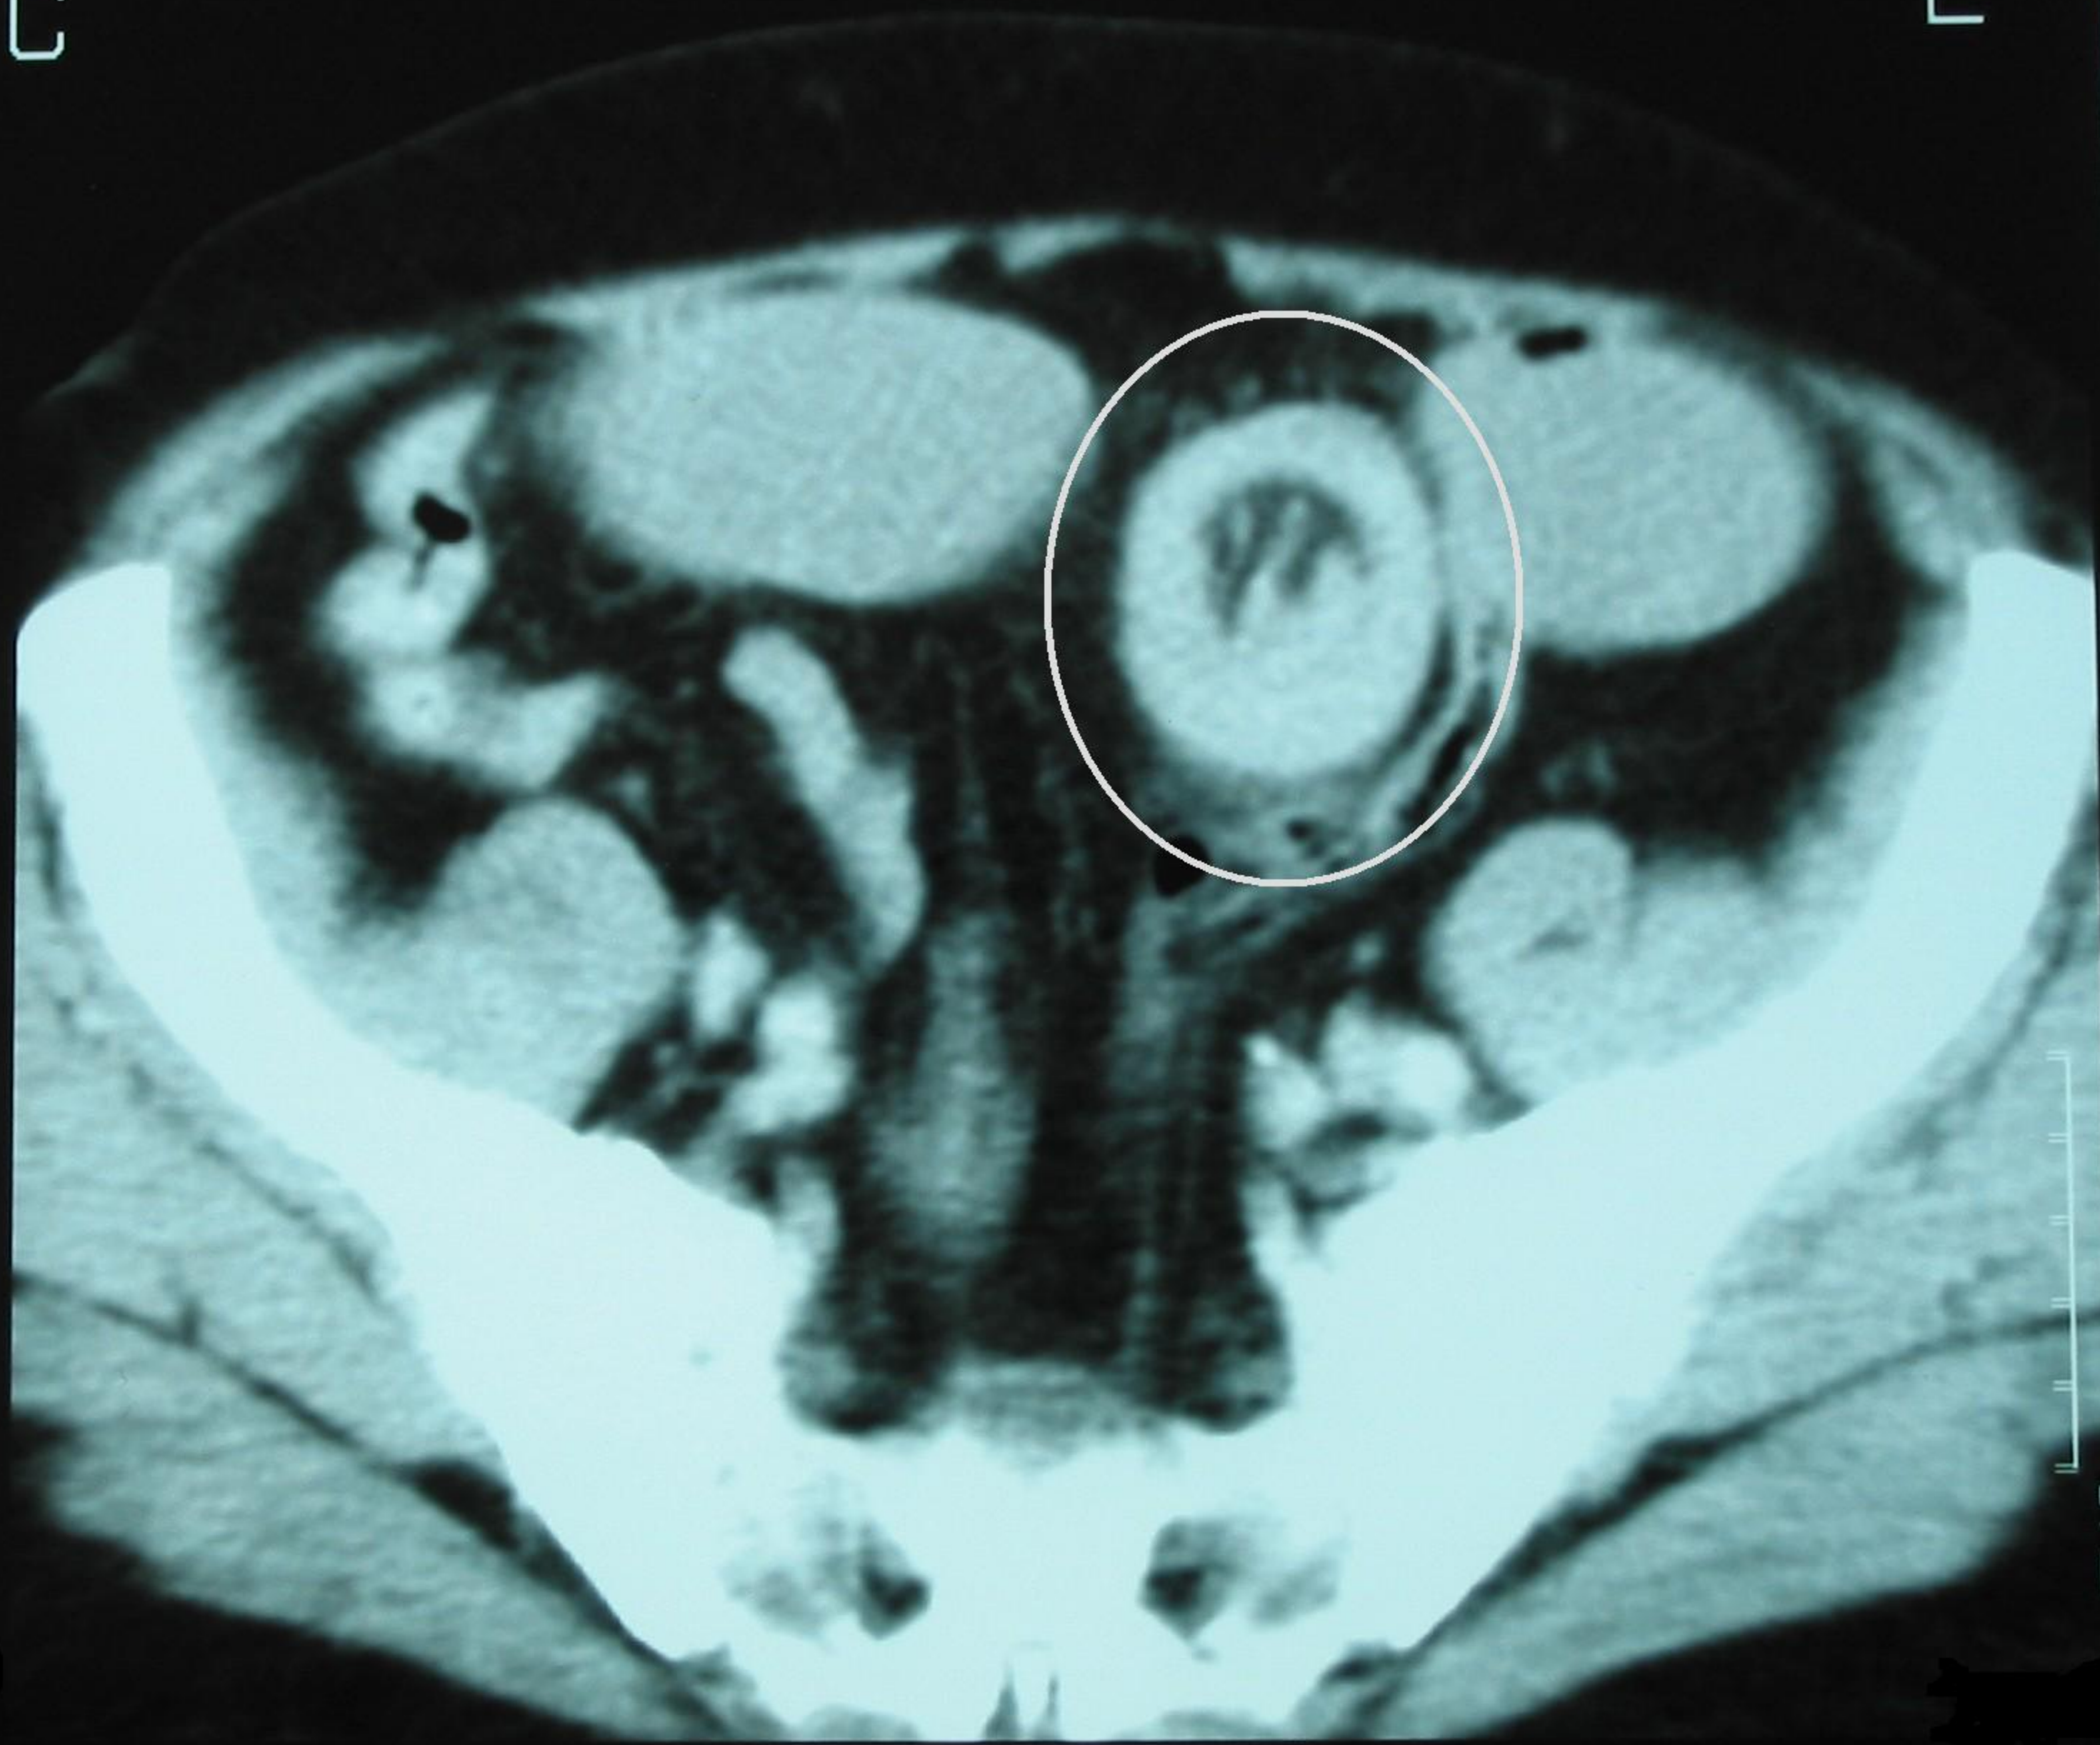

512\*  
MAG\*

Supplement: MOESM3 [file 9647904]
